# Supplementary material
Source: publisher site journal article supplement (https://www.dovepress.com/article/297980)
Supplement: Supplementary file 1 [file get_supplementary_file.php]

**Table 1.** Search strategies in Medline for randomized controlled trials.

| # | Search term | References |
| --- | --- | --- |
| **1** | Lung Diseases, Obstructive/ | 18.128 |
| **2** | exp Pulmonary Disease, Chronic Obstructive/ | 51.886 |
| **3** | emphysema$.ti,ab. | 25.161 |
| **4** | (chronic$ adj3 bronchiti$).ti,ab. | 10.974 |
| **5** | (obstruct$ adj3 (pulmonary or lung$ or airway$ or airflow$ or bronch$ or respirat$)).ti,ab. | 80.994 |
| **6** | (COPD or COAD or COBD or AECB).ti,ab. | 42.008 |
| **7** | 1 or 2 or 3 or 4 or 5 or 6 | 135.995 |
| **8** | "nebulizers and vaporizers"/ or dry powder inhalers/ or metered dose inhalers/ or inhalation spacers/ | 10.823 |
| **9** | (inhalator? or inhaler? or nebulizers? or vaporizer? or (device? adj3 inhalation)).ti,ab. | 11.183 |
| **10** | dry powder inhaler?.ti,ab. | 1.909 |
| **11** | (metered dose inhaler? or MDI or spacer inhaler? or spinhaler?).ti,ab. | 5.723 |
| **12** | (holding chamber adj3 (aerosol or valved)).ti,ab. | 102 |
| **13** | ((inhalation or tube) adj3 spacer?).ti,ab. | 101 |
| **14** | (Accuhaler or Aerolizer or Autohaler or Breezhaler or Clickhaler or Cyclohaler or Diskhaler or Diskus or Easi-Breathe or Easybreath or Easyhaler or Ellipta or Evohaler or Flexhaler or Forspiro or Genuair or Handihaler or Jenuair or Jethaler or Modulite or Neohaler or Nexthaler or Novolizer or pMDI or Podhaler or Pressair or Respimat or Rotahaler or JET or Spinhaler or Spiromax or Staccato or Swinghaler or Turbospin or Turbuhaler or Twincaps or Twisthaler).ti,ab. | 19.327 |
| **15** | 8 or 9 or 10 or 11 or 12 or 13 or 14 | 35.759 |
| **16** | 7 and 15 | 3.175 |
| **17** | (letter or "case report*" or "historical article*" or (comment or editorial or in vitro or news)).pt. | 4.065.963 |
| **18** | 16 not 17 | 2.899 |
| **19** | randomized controlled trial.pt. | 484.622 |
| **20** | controlled clinical trial.pt. | 93.136 |
| **21** | randomized.ab. | 447.277 |
| **22** | placebo.ab. | 198.805 |
| **23** | clinical trials as topic.sh. | 187.463 |
| **24** | randomly.ab. | 313.513 |
| **25** | trial.ti. | 200.806 |
| **26** | 19 or 20 or 21 or 22 or 23 or 24 or 25 | 1.223.687 |
| **27** | 18 and 26 | 1.093 |
| **28** | animals/ not (animals/ and humans/) | 4.560.694 |
| **29** | 27 not 28 | 1.083 |
| **30** | limit 29 to (english or french or spanish) | 1.042 |

**Table 2**. Search strategies in Medline for observational studies.

| # | Search terms | References |
| --- | --- | --- |
| **1** | Lung Diseases, Obstructive/ | 18.128 |
| **2** | exp Pulmonary Disease, Chronic Obstructive/ | 51.886 |
| **3** | emphysema$.ti,ab. | 25.161 |
| **4** | (chronic$ adj3 bronchiti$).ti,ab. | 10.974 |
| **5** | (obstruct$ adj3 (pulmonary or lung$ or airway$ or airflow$ or bronch$ or respirat$)).ti,ab. | 80.994 |
| **6** | (COPD or COAD or COBD or AECB).ti,ab. | 42.008 |
| **7** | 1 or 2 or 3 or 4 or 5 or 6 | 135.995 |
| **8** | "nebulizers and vaporizers"/ or dry powder inhalers/ or metered dose inhalers/ or inhalation spacers/ | 10.823 |
| **9** | (inhalator? or inhaler? or nebulizers? or vaporizer? or (device? adj3 inhalation)).ti,ab. | 11.183 |
| **10** | dry powder inhaler?.ti,ab. | 1.909 |
| **11** | (metered dose inhaler? or MDI or spacer inhaler? or spinhaler?).ti,ab. | 5.723 |
| **12** | (holding chamber adj3 (aerosol or valved)).ti,ab. | 102 |
| **13** | ((inhalation or tube) adj3 spacer?).ti,ab. | 101 |
| **14** | (Accuhaler or Aerolizer or Autohaler or Breezhaler or Clickhaler or Cyclohaler or Diskhaler or Diskus or Easi-Breathe or Easybreath or Easyhaler or Ellipta or Evohaler or Flexhaler or Forspiro or Genuair or Handihaler or Jenuair or Jethaler or Modulite or Neohaler or Nexthaler or Novolizer or pMDI or Podhaler or Pressair or Respimat or Rotahaler or JET or Spinhaler or Spiromax or Staccato or Swinghaler or Turbospin or Turbuhaler or Twincaps or Twisthaler).ti,ab. | 19.327 |
| **15** | 8 or 9 or 10 or 11 or 12 or 13 or 14 | 35.759 |
| **16** | 7 and 15 | 3.175 |
| **17** | (letter or "case report*" or "historical article*" or (comment or editorial or in vitro or news)).pt. | 4.065.963 |
| **18** | 16 not 17 | 2.899 |
| **19** | Epidemiologic studies/ | 8.013 |
| **20** | exp case control studies/ | 1.001.698 |
| **21** | exp cohort studies/ | 1.871.392 |
| **22** | Case control.tw. | 116.336 |
| **23** | (cohort adj (study or studies)).tw. | 178.817 |
| **24** | Cohort analy$.tw. | 7.069 |
| **25** | (Follow up adj (study or studies)).tw. | 47.084 |
| **26** | (observational adj (study or studies)).tw. | 93.400 |
| **27** | Longitudinal.tw. | 223.966 |
| **28** | Retrospective.tw. | 475.521 |
| **29** | Cross sectional.tw. | 313.320 |
| **30** | Cross-sectional studies/ | 297.490 |
| **31** | exp case study/ or (case$ and series).tw. or case reports.pt. or (case$ adj2 report$).tw. or (case$ adj2 stud$).tw. | 2.480.953 |
| **32** | 19 or 20 or 21 or 22 or 23 or 24 or 25 or 26 or 27 or 28 or 29 or 30 or 31 | 4.967.682 |
| **33** | 16 and 32 | 654 |
| **34** | animals/ not (animals/ and humans/) | 4.560.694 |
| **35** | 33 not 34 | 650 |
| **36** | limit 35 to (english or french or spanish) | 627 |

**Table 3**. Search strategies in Medline for systematic literature reviews and meta-analyses.

| # | Search terms | References |
| --- | --- | --- |
| **1** | Lung Diseases, Obstructive/ | 18.128 |
| **2** | exp Pulmonary Disease, Chronic Obstructive/ | 51.886 |
| **3** | emphysema$.ti,ab. | 25.161 |
| **4** | (chronic$ adj3 bronchiti$).ti,ab. | 10.974 |
| **5** | (obstruct$ adj3 (pulmonary or lung$ or airway$ or airflow$ or bronch$ or respirat$)).ti,ab | 80.994 |
| **6** | (COPD or COAD or COBD or AECB).ti,ab. | 42.008 |
| **7** | 1 or 2 or 3 or 4 or 5 or 6 | 135.995 |
| **8** | "nebulizers and vaporizers"/ or dry powder inhalers/ or metered dose inhalers/ or inhalation spacers/ | 10.823 |
| **9** | (inhalator? or inhaler? or nebulizers? or vaporizer? or (device? adj3 inhalation)).ti,ab. | 11.183 |
| **10** | dry powder inhaler?.ti,ab. | 1.909 |
| **11** | (metered dose inhaler? or MDI or spacer inhaler? or spinhaler?).ti,ab. | 5.723 |
| **12** | (holding chamber adj3 (aerosol or valved)).ti,ab. | 102 |
| **13** | ((inhalation or tube) adj3 spacer?).ti,ab. | 101 |
| **14** | (Accuhaler or Aerolizer or Autohaler or Breezhaler or Clickhaler or Cyclohaler or Diskhaler or Diskus or Easi-Breathe or Easybreath or Easyhaler or Ellipta or Evohaler or Flexhaler or Forspiro or Genuair or Handihaler or Jenuair or Jethaler or Modulite or Neohaler or Nexthaler or Novolizer or pMDI or Podhaler or Pressair or Respimat or Rotahaler or JET or Spinhaler or Spiromax or Staccato or Swinghaler or Turbospin or Turbuhaler or Twincaps or Twisthaler).ti,ab. | 19.327 |
| **15** | 8 or 9 or 10 or 11 or 12 or 13 or 14 | 35.759 |
| **16** | 7 and 15 | 3.175 |
| **17** | (letter or "case report*" or "historical article*" or (comment or editorial or in vitro or news)).pt. | 4.065.963 |
| **18** | 16 not 17 | 2.899 |
| **19** | meta-analysis.pt. | 102.327 |
| **20** | meta-analysis/ or systematic review/ or meta-analysis as topic/ or "meta analysis (topic)"/ or "systematic review (topic)"/ or exp technology assessment, biomedical/ | 192.113 |
| **21** | ((systematic* adj3 (review* or overview*)) or (methodologic* adj3 (review* or overview*))).ti,ab. | 160.649 |
| **22** | ((quantitative adj3 (review* or overview* or synthes*)) or (research adj3 (integrati* or overview*))).ti,ab. | 9.788 |
| **23** | ((integrative adj3 (review* or overview*)) or (collaborative adj3 (review* or overview*)) or (pool* adj3 analy*)).ti,ab. | 23.375 |
| **24** | (data synthes* or data extraction* or data abstraction*).ti,ab. | 23.712 |
| **25** | (handsearch* or hand search*).ti,ab. | 8.602 |
| **26** | (mantel haenszel or peto or der simonian or dersimonian or fixed effect* or latin square*).ti,ab. | 23.842 |
| **27** | (met analy* or metanaly* or technology assessment* or HTA or HTAs or technology overview* or technology appraisal*).ti,ab. | 8.115 |
| **28** | (meta regression* or metaregression*).ti,ab. | 7.482 |
| **29** | (meta-analy* or metaanaly* or systematic review* or biomedical technology assessment* or bio-medical technology assessment*).mp,hw. | 267.181 |
| **30** | (medline or cochrane or pubmed or medlars or embase or cinahl).ti,ab,hw. | 192.728 |
| **31** | (cochrane or (health adj2 technology assessment) or evidence report).jw. | 18.670 |
| **32** | (meta-analysis or systematic review).tw. | 208.966 |
| **33** | (comparative adj3 (efficacy or effectiveness)).ti,ab. | 11.813 |
| **34** | (outcomes research or relative effectiveness).ti,ab. | 7.075 |
| **35** | ((indirect or indirect treatment or mixed-treatment) adj comparison*).ti,ab. | 1.887 |
| **36** | 19 or 20 or 21 or 22 or 23 or 24 or 25 or 26 or 27 or 28 or 29 or 30 or 31 or 32 or 33 or 34 or 35 | 413.468 |
| **37** | 18 and 36 | 214 |
| **38** | animals/ not (animals/ and humans/) | 4.560.694 |
| **39** | 37 not 38 | 213 |
| **40** | limit 39 to (english or french or spanish) | 209 |

**Table 4**. Search strategies in Embase for randomized controlled trials.

| # | Search terms | References |
| --- | --- | --- |
| **29** | #28 AND [embase]/lim NOT ([embase]/lim AND [medline]/lim) AND ([english]/lim OR [french]/lim OR [spanish]/lim) AND [humans]/lim | 86 |
| **28** | #17 AND #27 | 794 |
| **27** | #18 OR #19 OR #20 OR #21 OR #22 OR #23 OR #24 OR #25 OR #26 | 2.132.386 |
| **26** | 'randomized controlled trial'/de | 525.199 |
| **25** | 'single blind procedure'/de | 33.346 |
| **24** | 'double blind procedure'/de | 157.803 |
| **23** | 'crossover procedure'/de | 57.625 |
| **22** | assign*:ab,ti OR allocat*:ab,ti OR volunteer*:ab,ti | 716.333 |
| **21** | ((doubl* OR singl*) NEAR/3 blind*):ti,ab | 219.247 |
| **20** | crossover*:ab,ti OR 'cross over*':ab,ti OR 'cross over':ti,ab | 97.797 |
| **19** | factorial*:ti,ab | 34.503 |
| **18** | random*:ti,ab | 1.361.435 |
| **17** | #15 NOT #16 | 2.702 |
| **16** | 'conference abstract'/it OR 'conference paper'/it OR 'note'/it OR 'short survey'/it OR 'abstract report'/exp OR 'letter'/exp | 6.370.346 |
| **15** | #6 AND #14 | 4.454 |
| **14** | #7 OR #8 OR #9 OR #10 OR #11 OR #12 OR #13 | 45.981 |
| **13** | accuhaler:ti,ab OR aerolizer:ti,ab OR autohaler:ti,ab OR breezhaler:ti,ab OR clickhaler:ti,ab OR cyclohaler:ti,ab OR diskhaler:ti,ab OR diskus:ti,ab OR 'easi breathe':ti,ab OR easybreath:ti,ab OR easyhaler:ti,ab OR ellipta:ti,ab OR evohaler:ti,ab OR flexhaler:ti,ab OR forspiro:ti,ab OR genuair:ti,ab OR handihaler:ti,ab OR jenuair:ti,ab OR jethaler:ti,ab OR modulite:ti,ab OR neohaler:ti,ab OR nexthaler:ti,ab OR novolizer:ti,ab OR pmdi:ti,ab OR podhaler:ti,ab OR pressair:ti,ab OR respimat:ti,ab OR rotahaler:ti,ab OR jet:ti,ab OR spinhaler:ti,ab OR spiromax:ti,ab OR staccato:ti,ab OR swinghaler:ti,ab OR turbospin:ti,ab OR turbuhaler:ti,ab OR twincaps:ti,ab OR twisthaler:ti,ab | 25.626 |
| **12** | ((inhalation OR tube) NEAR/3 spacer?):ti,ab |  |
| **11** | ('holding chamber' NEAR/3 (aerosol OR valved)):ti,ab | 19 |
| **10** | 'metered dose inhaler?':ti,ab OR mdi:ti,ab OR 'spacer inhaler?':ti,ab OR spinhaler?:ti,ab | 209 |
| **9** | 'dry powder inhaler?':ti,ab | 1.296 |
| **8** | inhalator?:ti,ab OR inhaler?:ti,ab OR nebulizers?:ti,ab OR vaporizer?:ti,ab OR ((device? NEAR/3 inhalation):ti,ab) | 7.314 |
| **7** | 'nebulizer'/de OR 'dry powder inhaler'/de OR 'metered dose inhaler'/de OR 'inhalation spacer'/de | 15.098 |
| **6** | #1 OR #2 OR #3 OR #4 OR #5 | 176.185 |
| **5** | copd:ab,ti OR coad:ab,ti OR cobd:ab,ti OR aecb:ab,ti | 56.755 |
| **4** | (obstruct$ NEAR/3 (pulmonary OR lung* OR airway* OR airflow* OR bronch* OR respirat*)):ab,ti | 173 |
| **3** | (chronic* NEAR/3 bronchiti*):ab,ti | 14.164 |
| **2** | 'lung emphysema'/exp | 22.079 |
| **1** | 'chronic obstructive lung disease'/exp | 88.520 |

**Table 5**. Search strategies in Embase for observational studies.

| # | Search terms | References |
| --- | --- | --- |
| **36** | #35 AND [embase]/lim NOT ([embase]/lim AND [medline]/lim) AND ([english]/lim OR [french]/lim OR [spanish]/lim) AND [humans]/lim | 222 |
| **35** | #17 AND #34 | 1.480 |
| **34** | #18 OR #19 OR #20 OR #21 OR #22 OR #25 OR #26 OR #27 OR #28 OR #29 OR #30 OR #31 OR #32 OR #33 | 9.706.002 |
| **33** | 'case study'/de OR 'case$ series':ti,ab OR 'case reports':pt OR ((case$ NEAR/2 (report$ OR stud$)):ti,ab) | 954.379 |
| **32** | ('cross sectional' NEAR/1 (study OR studies)):ab,ti | 189,759 |
| **31** | (epidemiologic? NEAR/1 (study OR studies)):ab,ti | 4 |
| **30** | (observational NEAR/1 (study OR studies)):ab,ti | 145.502 |
| **29** | ('follow up' NEAR/1 (study OR studies)):ab,ti | 67.456 |
| **28** | ('case control' NEAR/1 (study OR studies)):ti,ab | 123.059 |
| **27** | (cohort NEAR/1 (study OR studies)):ti,ab | 275.268 |
| **26** | 'cohort analysis'/exp | 475.613 |
| **25** | #23 NOT #24 | 522.417 |
| **24** | 'randomized controlled trial (topic)'/exp | 161.488 |
| **23** | 'prospective study'/exp | 527.817 |
| **22** | 'retrospective study'/exp | 786.594 |
| **21** | 'longitudinal study'/exp | 127.394 |
| **20** | 'family study'/exp | 26.760 |
| **19** | 'case control study'/exp | 158.351 |
| **18** | 'clinical study'/exp | 9.296.730 |
| **17** | #15 NOT #16 | 2.702 |
| **16** | 'conference abstract'/it OR 'conference paper'/it OR 'note'/it OR 'short survey'/it OR 'abstract report'/exp OR 'letter'/exp | 6.370.346 |
| **15** | #6 AND #14 | 4.454 |
| **14** | #7 OR #8 OR #9 OR #10 OR #11 OR #12 OR #13 | 45.981 |
| **13** | accuhaler:ti,ab OR aerolizer:ti,ab OR autohaler:ti,ab OR breezhaler:ti,ab OR clickhaler:ti,ab OR cyclohaler:ti,ab OR diskhaler:ti,ab OR diskus:ti,ab OR 'easi breathe':ti,ab OR easybreath:ti,ab OR easyhaler:ti,ab OR ellipta:ti,ab OR evohaler:ti,ab OR flexhaler:ti,ab OR forspiro:ti,ab OR genuair:ti,ab OR handihaler:ti,ab OR jenuair:ti,ab OR jethaler:ti,ab OR modulite:ti,ab OR neohaler:ti,ab OR nexthaler:ti,ab OR novolizer:ti,ab OR pmdi:ti,ab OR podhaler:ti,ab OR pressair:ti,ab OR respimat:ti,ab OR rotahaler:ti,ab OR jet:ti,ab OR spinhaler:ti,ab OR spiromax:ti,ab OR staccato:ti,ab OR swinghaler:ti,ab OR turbospin:ti,ab OR turbuhaler:ti,ab OR twincaps:ti,ab OR twisthaler:ti,ab | 25.626 |
| **12** | ((inhalation OR tube) NEAR/3 spacer?):ti,ab | 19 |
| **11** | ('holding chamber' NEAR/3 (aerosol OR valved)):ti,ab | 209 |
| **10** | 'metered dose inhaler?':ti,ab OR mdi:ti,ab OR 'spacer inhaler?':ti,ab OR spinhaler?:ti,ab | 7.202 |
| **9** | 'dry powder inhaler?':ti,ab | 1.296 |
| **8** | inhalator?:ti,ab OR inhaler?:ti,ab OR nebulizers?:ti,ab OR vaporizer?:ti,ab OR ((device? NEAR/3 inhalation):ti,ab) | 7.314 |
| **7** | 'nebulizer'/de OR 'dry powder inhaler'/de OR 'metered dose inhaler'/de OR 'inhalation spacer'/de | 15.098 |
| **6** | #1 OR #2 OR #3 OR #4 OR #5 | 176.185 |
| **5** | copd:ab,ti OR coad:ab,ti OR cobd:ab,ti OR aecb:ab,ti | 56.755 |
| **4** | (obstruct$ NEAR/3 (pulmonary OR lung* OR airway* OR airflow* OR bronch* OR respirat*)):ab,ti | 173 |
| **3** | (chronic* NEAR/3 bronchiti*):ab,ti | 14.164 |
| **2** | 'lung emphysema'/exp | 22.079 |
| **1** | 'chronic obstructive lung disease'/exp | 88.520 |

**Table 6.** Search strategies in Embase for systematic literature reviews and meta-analyses.

| # | Términos de la búsqueda | Citas |
| --- | --- | --- |
| **40** | #39 AND [embase]/lim NOT ([embase]/lim AND [medline]/lim) AND ([english]/lim OR [french]/lim OR [spanish]/lim) AND [humans]/lim | 14 |
| **39** | #17 AND #38 | 100 |
| **38** | #18 OR #19 OR #20 OR #21 OR #22 OR #23 OR #24 OR #25 OR #26 OR #27 OR #28 OR #29 OR #30 OR #31 OR #32 OR #37 | 289.912 |
| **37** | #35 AND #36 | 0 |
| **36** | 'review':pt | 0 |
| **35** | #33 OR #34 | 41.523 |
| **34** | 'selection criteria':ab | 26.718 |
| **33** | 'data extraction':ab | 16.434 |
| **32** | 'relevant journals':ab | 1.087 |
| **31** | 'manual search?' | 1 |
| **30** | 'hand search?' | 0 |
| **29** | bibliograph? | 14.395 |
| **28** | 'reference lists':ab | 13.736 |
| **27** | bids.ab | 0 |
| **26** | cinahl:ab OR cinhal:ab | 16.543 |
| **25** | psychinfo:ab OR psycinfo:ab | 13.293 |
| **24** | psychlit:ab OR psyclit:ab | 957 |
| **23** | embase:ab | 54.605 |
| **22** | 'cochrane':ab | 54.291 |
| **21** | cancerlit:ab | 672 |
| **20** | (systematic NEAR/1 (review? OR overvie?)):ab,ti | 17.335 |
| **19** | (meta NEAR/3 analy?) OR metaanalys? | 433 |
| **18** | 'meta analysis'/exp | 109.436 |
| **17** | #15 NOT #16 | 2.702 |
| **16** | 'conference abstract'/it OR 'conference paper'/it OR 'note'/it OR 'short survey'/it OR 'abstract report'/exp OR 'letter'/exp | 6.370.346 |
| **15** | #6 AND #14 | 4.454 |
| **14** | #7 OR #8 OR #9 OR #10 OR #11 OR #12 OR #13 | 45.981 |
| **13** | accuhaler:ti,ab OR aerolizer:ti,ab OR autohaler:ti,ab OR breezhaler:ti,ab OR clickhaler:ti,ab OR cyclohaler:ti,ab OR diskhaler:ti,ab OR diskus:ti,ab OR 'easi breathe':ti,ab OR easybreath:ti,ab OR easyhaler:ti,ab OR ellipta:ti,ab OR evohaler:ti,ab OR flexhaler:ti,ab OR forspiro:ti,ab OR genuair:ti,ab OR handihaler:ti,ab OR jenuair:ti,ab OR jethaler:ti,ab OR modulite:ti,ab OR neohaler:ti,ab OR nexthaler:ti,ab OR novolizer:ti,ab OR pmdi:ti,ab OR podhaler:ti,ab OR pressair:ti,ab OR respimat:ti,ab OR rotahaler:ti,ab OR jet:ti,ab OR spinhaler:ti,ab OR spiromax:ti,ab OR staccato:ti,ab OR swinghaler:ti,ab OR turbospin:ti,ab OR turbuhaler:ti,ab OR twincaps:ti,ab OR twisthaler:ti,ab | 25.626 |
| **12** | ((inhalation OR tube) NEAR/3 spacer?):ti,ab | 19 |
| **11** | ('holding chamber' NEAR/3 (aerosol OR valved)):ti,ab | 209 |
| **10** | 'metered dose inhaler?':ti,ab OR mdi:ti,ab OR 'spacer inhaler?':ti,ab OR spinhaler?:ti,ab | 7.202 |
| **9** | 'dry powder inhaler?':ti,ab | 1.296 |
| **8** | inhalator?:ti,ab OR inhaler?:ti,ab OR nebulizers?:ti,ab OR vaporizer?:ti,ab OR ((device? NEAR/3 inhalation):ti,ab) | 7.314 |
| **7** | 'nebulizer'/de OR 'dry powder inhaler'/de OR 'metered dose inhaler'/de OR 'inhalation spacer'/de | 15.098 |
| **6** | #1 OR #2 OR #3 OR #4 OR #5 | 176.185 |
| **5** | copd:ab,ti OR coad:ab,ti OR cobd:ab,ti OR aecb:ab,ti | 56.755 |
| **4** | (obstruct$ NEAR/3 (pulmonary OR lung* OR airway* OR airflow* OR bronch* OR respirat*)):ab,ti | 173 |
| **3** | (chronic* NEAR/3 bronchiti*):ab,ti | 14.164 |
| **2** | 'lung emphysema'/exp | 22.079 |
| **1** | 'chronic obstructive lung disease'/exp | 88.520 |

**Table 7.** Search strategies in the Cochrane Library.

| # | Términos de la búsqueda | Citas |
| --- | --- | --- |
| **1** | [mh ^"Lung Diseases, Obstructive"] | 2.511 |
| **2** | [mh ^"Pulmonary Disease, Chronic Obstructive"] | 4.494 |
| **3** | emphysema*:ti,ab | 1.206 |
| **4** | (chronic* NEAR/3 bronchiti*):ti,ab | 1.791 |
| **5** | (obstructive NEAR/3 (pulmonary or lung* or airway* or airflow* or bronch* or respirat*)):ti | 6.457 |
| **6** | (COPD or COAD or COBD or AECB):ti,ab | 14.836 |
| **7** | #1 or #2 or #3 or #4 or #5 | 12.236 |
| **8** | [mh "nebulizers and vaporizers"] or [mh "dry powder inhalers"] or [mh "metered dose inhalers"] or [mh "inhalation spacers"] | 2.242 |
| **9** | (inhalator? or inhaler? or nebulizers? or vaporizer? or (device? NEAR/3 inhalation)):ti | 2.827 |
| **10** | dry powder inhaler?:ti,ab | 1.559 |
| **11** | (metered dose inhaler? or MDI or spacer inhaler? or spinhaler?):ti,ab | 3.866 |
| **12** | (holding chamber NEAR/3 (aerosol or valved)):ti,ab | 84 |
| **13** | ((inhalation or tube) NEAR/3 spacer?):ti,ab | 55 |
| **14** | (Accuhaler or Aerolizer or Autohaler or Breezhaler or Clickhaler or Cyclohaler or Diskhaler or Diskus or Easi-Breathe or Easybreath or Easyhaler or Ellipta or Evohaler or Flexhaler or Forspiro or Genuair or Handihaler or Jenuair or Jethaler or Modulite or Neohaler or Nexthaler or Novolizer or pMDI or Podhaler or Pressair or Respimat or Rotahaler or JET or Spinhaler or Spiromax or Staccato or Swinghaler or Turbospin or Turbuhaler or Twincaps or Twisthaler):ti,ab | 4.998 |
| **15** | #8 or #9 or #10 or #11 or #12 or #13 or #14 | 9.879 |
| **16** | #7 AND #15 in Cochrane Reviews, Trials | 1.223 |

**Table 8**. Search terms of the narrative reviews.

| # | Pubmed Clinical Queries tool |
| --- | --- |
| **1** | lung deposition and COPD: Clinical Study Categories (diagnosis) |
| **2** | lung deposition and COPD: Systematic reviews |
| **3** | inspiratory flow and COPD: Clinical Study Categories (diagnosis) |
| **4** | inspiratory flow and COPD: Systematic reviews |
| **#** | **Pubmed regular searches** |
| **1** | "Pulmonary Disease, Chronic Obstructive"[Mesh] AND "lung deposition" |
| **2** | "Pulmonary Disease, Chronic Obstructive"[Mesh] AND ("Lung/metabolism"[MeSH] OR "Lung/physiopathology"[MeSH]) AND review |
| **3** | "Pulmonary Disease, Chronic Obstructive"[Mesh] AND "inspiratory flow" |

**Table 9**. Excluded studies and reasons for exclusion.

| # | Study | Exclusion criteria |
| --- | --- | --- |
| **1** | Ali_2014 (1) | Methodological study |
| **2** | Allen_1988 (2) | Focused on drugs effects |
| **3** | Anderson_2006 (3) | Narrative review |
| **4** | Ardestani_2018 (4) | Focused on drugs effects |
| **5** | Arunthari_2012 (5) | Focused on drugs effects |
| **6** | Berger_2013 (6) | Focused on drugs effects |
| **7** | Biswas_2017 (7) | Analysis of inhalation techniques |
| **8** | Broocklebank_2001 (8) | Narrative review |
| **9** | Chapman_1990 (9) | Non-interest outcomes |
| **10** | Chrystyn_2012 (10) | Narrative review |
| **11** | Dahl_2016 (11) | Non-interest outcomes |
| **12** | Daley-Yates_ 2014 (12) | Pharmacodynamics study |
| **13** | De Backer_2018 (13) | Non-interest outcomes |
| **14** | De Boer_1997 (14) | Non-interest outcomes |
| **15** | Delvadia_2013 (15) | Outcomes depicted in graphics |
| **16** | Diggory_1991 (16) | Analysis of inhalation technique |
| **17** | Dolowich_2000 (17) | Narrative review |
| **18** | Dolowich_2005 (18) | Clinical guideline |
| **19** | Dolowich_2011 (19) | Narrative review |
| **20** | Duarte_2000 (20) | Non-interest outcomes |
| **21** | Duarte de Araujo_ 2019 (21) | Adherence study |
| **22** | Easton_2010 (22) | Focused on drugs effects |
| **23** | Ehtezazi_2004 (24) | Non-interest outcomes |
| **24** | Ehtezazi_2005 (23) | Non-interest outcomes |
| **25** | Fenton_2003 (25) | Narrative review |
| **26** | Frohnhofen_2011 (26) | Non-interest outcomes |
| **27** | Galindo-Filho_2015 (28) | No data of inhaler devices |
| **28** | Galindo-Filho_2019 (27) | No data of inhaler devices |
| **29** | Gosh_2019 (29) | Prevalence study |
| **30** | Guerin_1999 (30) | No data of inhaler devices |
| **31** | Ikeda_1999 (31) | Focused on drugs effects |
| **32** | Imhof_1993 (32) | Focused on drugs effects |
| **33** | Lawford_1983 (33) | No data of inhaler devices |
| **34** | Leach_1999 (34) | Narrative review |
| **35** | Loh_2007 (35) | No data of inhaler devices |
| **36** | Mahler_2013 (37) | Prevalence study |
| **37** | Mahler_2014 (38) | Focused on drugs effects |
| **38** | Mahler_2017 (36) | Narrative review |
| **39** | Malerba_2019 (39) | Focused on drugs effects |
| **40** | Mannan_2019 (40) | Non-interest outcomes |
| **41** | Mansfield_2019 (41) | Non-interest outcomes |
| **42** | Melani_2005 (42) | Non-interest outcomes |
| **43** | Mineshita_2014 (43) | Datos espirométricos |
| **44** | Molimard_2007 (44) | Narrative review |
| **45** | Molino_ 2017 (45) | Datos espirométricos |
| **46** | Mortensen_1991 (46) | No data of inhaler devices |
| **47** | Mouloudi_1998 (47) | Non-interest outcomes |
| **48** | Mouloudi_1999 (48) | Non-interest outcomes |
| **49** | Mouloudi_2000 (49) | Non-interest outcomes |
| **50** | Nave_2010 (50) | Narrative review |
| **51** | Newman_1985 (52) | Narrative review |
| **52** | Newman_1989 (53) | Patients with asthma |
| **53** | Newman_1991 (55) | Patients with asthma |
| **54** | Newman_1996 (54) | Narrative review |
| **55** | Newman_2006 (51) | Patients with asthma |
| **56** | Ninane_2015 (56) | Focused on drugs effects |
| **57** | Olseni_1994 (57) | No data of inhaler devices |
| **58** | Pitcairn_2005 (58) | Patients with asthma |
| **59** | Pohlmann_2018 (59) | Non-interest outcomes |
| **60** | Price_2018 (60) | Prediction study |
| **61** | Rabea_2017 (61) | Mathematical model |
| **62** | Ram_2011 (62) | Focused on drugs effects |
| **63** | Ramlal_2013 (63) | Focused on drugs effects |
| **64** | Salvi_2013 (64) | Narrative review |
| **65** | Sharma_2017 (65) | Non-interest outcomes |
| **66** | Stark_1985 (66) | Animal study |
| **67** | Stresemann_1975 (67) | Not found |
| **68** | Summer_1989 (68) | Focused on drugs effects |
| **69** | Taube_2012 (69) | Focused on drugs effects |
| **70** | Taylor_2016 (70) | Validation study |
| **71** | Thomas_1988 (71) | Non-interest outcomes |
| **72** | Thorsson_1994 (72) | Mathematical model |
| **73** | Vitacca_1997 (73) | No data of inhaler devices |
| **74** | Wee_2013 (75) | Mathematic model |
| **75** | Zainudin_1990 (74) | Patients with asthma |
